# Supplementary material for: Exploring flat-band properties in two-dimensional M3QX7 compounds
Source: Royal Society of Chemistry journal article supplement (doi:10.1039/d4cp01196a), 2024-01-01
Supplement: d4cp01196a1.pdf [file d4cp01196a1.pdf]

## Supplementary Materials for: Exploring Flat-Band Properties in Two-Dimensional $M_3QX_7$ Compounds

Hai-Chen Wang <sup>1</sup> Tomáš Rauch <sup>2</sup> Andres Tellez,<sup>3</sup> Ludger Wirtz <sup>4</sup> Aldo H. Romero <sup>3,4,\*</sup> and Miguel A. L. Marques <sup>1,†</sup>

<sup>1</sup>Research Center Future Energy Materials and Systems of the University Alliance Ruhr, Faculty of Mechanical Engineering, Ruhr University Bochum, Universitätsstraße 150, D-44801 Bochum, Germany

<sup>2</sup>Friedrich-Schiller-University Jena, 07743 Jena, Germany

<sup>3</sup>Department of Physics, West Virginia University, Morgantown, WV 26506, USA

<sup>4</sup>Department of Physics and Materials Science, University of Luxembourg, 162a avenue de la Faïencerie, L-1511 Luxembourg, Luxembourg

(Dated: June 17, 2024)

TABLE S1: Distance to the convex-hull ( $E_{\text{hull}}$  in eV), formation energy ( $E_{\text{form}}$  in eV), indirect band gap ( $E_{\text{Gap}}$  in eV), magnetization per metal atom (in  $\mu_B$ ), minimal dispersion ( $D_{\text{min}}$  in meV) of the band between  $-3.0$  to  $+3.0$  eV around Fermi level, and the mean eigenvalue of this flattest band relative to Fermi level ( $\bar{E}$  in eV). Note the  $D_{\text{min}}$  values listed are calculated on a coarse  $k$ -grid and therefore are underestimated. All results obtained with the PBE functional. For completeness we also include the case where X and Q are the same chemical element, leading to the composition  $M_3X_8$ .

| Formula                               | $E_{\text{hull}}$ | $E_{\text{form}}$ | $E_{\text{Gap}}$ | $M$ | $D_{\text{min}}$ | $\bar{E}$ |                                   |       |       |      |     |     |        |
|---------------------------------------|-------------------|-------------------|------------------|-----|------------------|-----------|-----------------------------------|-------|-------|------|-----|-----|--------|
| Fe <sub>3</sub> I <sub>8</sub>        | -0.010            | -0.07             | 0.02             | 4.5 | 36               | 0.533     | Zr <sub>3</sub> Cl <sub>8</sub>   | 0.017 | -2.13 | 0.55 | 0.7 | 21  | -0.162 |
| V <sub>3</sub> Cl <sub>8</sub>        | -0.008            | -1.65             | 0.00             | 2.3 | 30               | -0.140    | Sc <sub>3</sub> IBr <sub>7</sub>  | 0.018 | -1.60 | 0.00 | 0.4 | 26  | 0.968  |
| V <sub>3</sub> ICl <sub>7</sub>       | -0.007            | -1.50             | 0.00             | 2.3 | 29               | -0.119    | Mn <sub>3</sub> Br <sub>8</sub>   | 0.020 | -0.67 | 0.00 | 4.3 | 17  | 1.672  |
| Nb <sub>3</sub> IBr <sub>7</sub>      | -0.004            | -0.85             | 0.33             | 0.4 | 59               | -0.875    | Sc <sub>3</sub> Br <sub>8</sub>   | 0.020 | -1.65 | 0.00 | 0.4 | 22  | 1.029  |
| Ti <sub>3</sub> ICl <sub>7</sub>      | -0.001            | -1.86             | 0.51             | 0.7 | 19               | 1.025     | Zr <sub>3</sub> Br <sub>8</sub>   | 0.021 | -1.33 | 0.62 | 0.7 | 34  | -0.137 |
| Ti <sub>3</sub> BrCl <sub>7</sub>     | -0.001            | -1.91             | 0.47             | 0.7 | 25               | 1.042     | Mn <sub>3</sub> I <sub>8</sub>    | 0.021 | -0.33 | 0.00 | 4.3 | 27  | 1.472  |
| Nb <sub>3</sub> BrCl <sub>7</sub>     | 0.001             | -1.60             | 0.24             | 0.3 | 29               | -1.247    | In <sub>3</sub> SeCl <sub>7</sub> | 0.022 | -1.37 | 2.84 | 0.0 | 81  | -0.764 |
| <b>Nb<sub>3</sub>Br<sub>8</sub></b>   | 0.001             | -0.90             | 0.34             | 0.4 | 58               | -0.895    | Sc <sub>3</sub> BrCl <sub>7</sub> | 0.022 | -2.37 | 0.00 | 0.4 | 30  | 1.008  |
| Ti <sub>3</sub> Cl <sub>8</sub>       | 0.001             | -2.01             | 0.43             | 0.7 | 37               | 1.364     | Sc <sub>3</sub> ICl <sub>7</sub>  | 0.023 | -2.31 | 0.00 | 0.4 | 39  | 0.994  |
| V <sub>3</sub> Br <sub>8</sub>        | 0.002             | -0.86             | 0.00             | 2.3 | 26               | 2.235     | Ti <sub>3</sub> I <sub>8</sub>    | 0.023 | -0.74 | 0.00 | 1.3 | 23  | 1.460  |
| Ti <sub>3</sub> TeCl <sub>7</sub>     | 0.003             | -1.86             | 0.64             | 1.0 | 15               | -2.390    | Sc <sub>3</sub> TeBr <sub>7</sub> | 0.024 | -1.62 | 2.05 | 0.0 | 51  | 2.732  |
| V <sub>3</sub> I <sub>8</sub>         | 0.003             | -0.46             | 0.00             | 2.3 | 33               | 2.218     | Sc <sub>3</sub> Cl <sub>8</sub>   | 0.024 | -2.47 | 0.00 | 0.4 | 27  | 1.009  |
| <b>Nb<sub>3</sub>Cl<sub>8</sub></b>   | 0.003             | -1.70             | 0.25             | 0.3 | 20               | -1.277    | Zr <sub>3</sub> I <sub>8</sub>    | 0.025 | -0.90 | 0.56 | 0.7 | 40  | -0.278 |
| <b>Nb<sub>3</sub>TeCl<sub>7</sub></b> | 0.003             | -1.58             | 0.75             | 0.0 | 20               | -0.267    | Zr <sub>3</sub> SeCl <sub>7</sub> | 0.025 | -2.04 | 0.43 | 1.0 | 16  | -2.933 |
| Mn <sub>3</sub> Cl <sub>8</sub>       | 0.003             | -1.40             | 0.00             | 4.3 | 35               | 1.576     | Sc <sub>3</sub> SeCl <sub>7</sub> | 0.027 | -2.41 | 2.81 | 0.0 | 29  | -0.114 |
| Nb <sub>3</sub> ICl <sub>7</sub>      | 0.003             | -1.55             | 0.21             | 0.3 | 51               | -1.226    | Sc <sub>3</sub> TeCl <sub>7</sub> | 0.028 | -2.33 | 2.20 | 0.0 | 22  | -0.380 |
| Nb <sub>3</sub> TeBr <sub>7</sub>     | 0.004             | -0.88             | 0.70             | 0.0 | 54               | 2.548     | Ta <sub>3</sub> TeCl <sub>7</sub> | 0.028 | -1.52 | 0.80 | 0.0 | 30  | -0.287 |
| Nb <sub>3</sub> SeCl <sub>7</sub>     | 0.004             | -1.64             | 0.80             | 0.0 | 20               | -0.254    | Zr <sub>3</sub> TeBr <sub>7</sub> | 0.030 | -1.28 | 0.40 | 1.0 | 35  | -2.424 |
| Zr <sub>3</sub> ICl <sub>7</sub>      | 0.004             | -1.99             | 0.55             | 0.6 | 48               | -0.218    | Pm <sub>3</sub> I <sub>8</sub>    | 0.032 | -1.35 | 0.00 | 0.3 | 76  | -2.465 |
| Nb <sub>3</sub> SCl <sub>7</sub>      | 0.005             | -1.73             | 0.85             | 0.0 | 23               | -0.247    | Y <sub>3</sub> TeBr <sub>7</sub>  | 0.032 | -1.79 | 2.78 | 0.0 | 33  | -2.636 |
| <b>Nb<sub>3</sub>I<sub>8</sub></b>    | 0.006             | -0.50             | 0.29             | 0.3 | 39               | -0.896    | Ni <sub>3</sub> Br <sub>8</sub>   | 0.032 | -0.25 | 0.00 | 1.3 | 70  | -0.570 |
| Nb <sub>3</sub> TeI <sub>7</sub>      | 0.007             | -0.52             | 0.61             | 0.0 | 30               | -0.151    | Er <sub>3</sub> TeBr <sub>7</sub> | 0.033 | -1.77 | 2.90 | 0.0 | 51  | -2.402 |
| <b>Nb<sub>3</sub>SBr<sub>7</sub></b>  | 0.007             | -1.03             | 0.79             | 0.0 | 74               | 2.881     | Fe <sub>3</sub> Br <sub>8</sub>   | 0.033 | -0.41 | 0.00 | 4.7 | 11  | 0.309  |
| Fe <sub>3</sub> Cl <sub>8</sub>       | 0.009             | -1.14             | 0.00             | 4.7 | 25               | 0.373     | Ho <sub>3</sub> TeBr <sub>7</sub> | 0.033 | -1.78 | 2.87 | 0.0 | 49  | -2.444 |
| V <sub>3</sub> TeCl <sub>7</sub>      | 0.010             | -1.47             | 0.07             | 2.0 | 11               | 1.988     | Dy <sub>3</sub> TeBr <sub>7</sub> | 0.034 | -1.78 | 2.86 | 0.0 | 28  | -2.417 |
| Ti <sub>3</sub> Br <sub>8</sub>       | 0.011             | -1.19             | 0.40             | 0.6 | 20               | 0.999     | Tb <sub>3</sub> TeBr <sub>7</sub> | 0.034 | -1.78 | 2.84 | 0.0 | 22  | -2.405 |
| Zr <sub>3</sub> BrCl <sub>7</sub>     | 0.012             | -2.04             | 0.54             | 0.7 | 30               | -0.192    | Y <sub>3</sub> SeCl <sub>7</sub>  | 0.035 | -2.57 | 3.42 | 0.0 | 12  | -2.388 |
| Zr <sub>3</sub> IBr <sub>7</sub>      | 0.012             | -1.29             | 0.61             | 0.7 | 48               | -0.157    | Sm <sub>3</sub> TeBr <sub>7</sub> | 0.035 | -1.78 | 2.77 | 0.1 | 18  | -0.109 |
| Sc <sub>3</sub> I <sub>8</sub>        | 0.013             | -1.20             | 0.00             | 0.4 | 32               | 0.889     | Pm <sub>3</sub> TeBr <sub>7</sub> | 0.035 | -1.78 | 2.74 | 0.1 | 18  | -2.186 |
| <b>Ta<sub>3</sub>TeI<sub>7</sub></b>  | 0.013             | -0.43             | 0.67             | 0.0 | 42               | -0.154    | Cu <sub>3</sub> F <sub>8</sub>    | 0.036 | -1.68 | 0.06 | 1.7 | 25  | 0.855  |
| Ni <sub>3</sub> Cl <sub>8</sub>       | 0.015             | -0.91             | 0.00             | 1.3 | 103              | -2.391    | Tb <sub>3</sub> SeCl <sub>7</sub> | 0.036 | -2.57 | 3.47 | 0.0 | 26  | -0.120 |
| <b>Ta<sub>3</sub>SeI<sub>7</sub></b>  | 0.015             | -0.49             | 0.70             | 0.0 | 29               | -0.152    | Dy <sub>3</sub> SeCl <sub>7</sub> | 0.036 | -2.57 | 3.51 | 0.0 | 27  | -0.119 |
| Zr <sub>3</sub> TeCl <sub>7</sub>     | 0.017             | -1.98             | 0.37             | 1.0 | 11               | -2.563    | Hf <sub>3</sub> IBr <sub>7</sub>  | 0.036 | -1.19 | 0.56 | 0.6 | 69  | -0.295 |
|                                       |                   |                   |                  |     |                  |           | Pd <sub>3</sub> Cl <sub>8</sub>   | 0.036 | -0.79 | 0.00 | 0.7 | 112 | -1.211 |
|                                       |                   |                   |                  |     |                  |           | Ru <sub>3</sub> I <sub>8</sub>    | 0.036 | -0.03 | 0.00 | 0.7 | 48  | -0.299 |
|                                       |                   |                   |                  |     |                  |           | Y <sub>3</sub> I <sub>8</sub>     | 0.037 | -1.34 | 0.00 | 0.3 | 85  | -2.516 |
|                                       |                   |                   |                  |     |                  |           | Ho <sub>3</sub> SeCl <sub>7</sub> | 0.037 | -2.57 | 3.55 | 0.0 | 17  | -2.438 |
|                                       |                   |                   |                  |     |                  |           | In <sub>3</sub> TeCl <sub>7</sub> | 0.037 | -1.33 | 2.44 | 0.0 | 34  | -0.935 |
|                                       |                   |                   |                  |     |                  |           | Er <sub>3</sub> SeCl <sub>7</sub> | 0.037 | -2.57 | 3.60 | 0.0 | 8   | -2.445 |
|                                       |                   |                   |                  |     |                  |           | Tm <sub>3</sub> SeCl <sub>7</sub> | 0.037 | -2.57 | 3.65 | 0.0 | 22  | -2.465 |
|                                       |                   |                   |                  |     |                  |           | Y <sub>3</sub> TeCl <sub>7</sub>  | 0.038 | -2.50 | 2.94 | 0.1 | 35  | -0.193 |
|                                       |                   |                   |                  |     |                  |           | Y <sub>3</sub> SCl <sub>7</sub>   | 0.038 | -2.66 | 3.72 | 0.0 | 5   | -2.107 |
|                                       |                   |                   |                  |     |                  |           | Er <sub>3</sub> TeCl <sub>7</sub> | 0.039 | -2.49 | 3.06 | 0.0 | 31  | -0.216 |
|                                       |                   |                   |                  |     |                  |           | Tm <sub>3</sub> TeCl <sub>7</sub> | 0.039 | -2.49 | 3.08 | 0.0 | 23  | -2.943 |
|                                       |                   |                   |                  |     |                  |           | Ho <sub>3</sub> TeCl <sub>7</sub> | 0.039 | -2.49 | 3.04 | 0.0 | 37  | -2.584 |
|                                       |                   |                   |                  |     |                  |           | Dy <sub>3</sub> TeCl <sub>7</sub> | 0.040 | -2.49 | 3.02 | 0.1 | 36  | -2.547 |
|                                       |                   |                   |                  |     |                  |           | Tb <sub>3</sub> TeCl <sub>7</sub> | 0.040 | -2.49 | 3.00 | 0.1 | 39  | -2.508 |
|                                       |                   |                   |                  |     |                  |           | Tb <sub>3</sub> SCl <sub>7</sub>  | 0.040 | -2.66 | 3.78 | 0.0 | 19  | -2.122 |

\* Aldo.Romero@mail.wvu.edu

† miguel.marques@rub.de

|                                   |       |       |      |     |     |        |                                   |       |       |      |     |     |        |
|-----------------------------------|-------|-------|------|-----|-----|--------|-----------------------------------|-------|-------|------|-----|-----|--------|
| Dy <sub>3</sub> ScI <sub>7</sub>  | 0.040 | -2.66 | 3.81 | 0.0 | 20  | -2.130 | Y <sub>3</sub> BrCl <sub>7</sub>  | 0.071 | -2.48 | 0.00 | 0.3 | 72  | 2.960  |
| Tb <sub>3</sub> I <sub>8</sub>    | 0.040 | -1.33 | 0.00 | 0.1 | 76  | 2.034  | Ta <sub>3</sub> I <sub>8</sub>    | 0.071 | -0.38 | 0.24 | 0.3 | 23  | -0.787 |
| Ho <sub>3</sub> ScI <sub>7</sub>  | 0.040 | -2.66 | 3.85 | 0.0 | 7   | -2.149 | Ho <sub>3</sub> Br <sub>8</sub>   | 0.071 | -1.76 | 0.00 | 0.3 | 109 | 1.695  |
| Sm <sub>3</sub> SeCl <sub>7</sub> | 0.040 | -2.55 | 3.36 | 0.0 | 13  | -2.802 | Sm <sub>3</sub> ICl <sub>7</sub>  | 0.072 | -2.41 | 0.00 | 0.3 | 36  | 2.370  |
| Sm <sub>3</sub> I <sub>8</sub>    | 0.041 | -1.34 | 0.00 | 0.2 | 78  | -2.481 | Pr <sub>3</sub> IBr <sub>7</sub>  | 0.072 | -1.72 | 0.00 | 0.3 | 62  | 2.261  |
| Ce <sub>3</sub> IBr <sub>7</sub>  | 0.041 | -1.69 | 0.00 | 1.3 | 2   | 1.186  | Tb <sub>3</sub> ICl <sub>7</sub>  | 0.072 | -2.42 | 0.00 | 0.3 | 41  | 2.401  |
| Nd <sub>3</sub> I <sub>8</sub>    | 0.042 | -1.35 | 0.00 | 0.3 | 74  | -2.455 | Ru <sub>3</sub> Br <sub>8</sub>   | 0.073 | -0.21 | 0.00 | 0.7 | 66  | 0.377  |
| Nd <sub>3</sub> TeBr <sub>7</sub> | 0.043 | -1.78 | 2.71 | 0.1 | 8   | -2.169 | La <sub>3</sub> IBr <sub>7</sub>  | 0.073 | -1.82 | 0.40 | 0.4 | 2   | 0.512  |
| Ce <sub>3</sub> Br <sub>8</sub>   | 0.043 | -1.75 | 0.00 | 1.3 | 1   | 1.193  | Sm <sub>3</sub> BrCl <sub>7</sub> | 0.073 | -2.46 | 0.00 | 0.3 | 143 | 2.153  |
| Sm <sub>3</sub> TeCl <sub>7</sub> | 0.043 | -2.48 | 2.94 | 0.1 | 16  | -0.114 | Ce <sub>3</sub> TeCl <sub>7</sub> | 0.073 | -2.40 | 0.08 | 1.0 | 2   | -0.060 |
| Np <sub>3</sub> I <sub>8</sub>    | 0.043 | -0.81 | 0.00 | 4.3 | 12  | 0.095  | Y <sub>3</sub> Cl <sub>8</sub>    | 0.074 | -2.58 | 0.00 | 0.3 | 102 | 2.945  |
| Hf <sub>3</sub> ICl <sub>7</sub>  | 0.044 | -1.92 | 0.50 | 0.7 | 67  | -0.362 | Co <sub>3</sub> Br <sub>8</sub>   | 0.075 | -0.24 | 0.00 | 0.3 | 79  | -0.209 |
| Dy <sub>3</sub> I <sub>8</sub>    | 0.044 | -1.32 | 0.00 | 0.0 | 89  | -2.583 | Dy <sub>3</sub> ICl <sub>7</sub>  | 0.075 | -2.42 | 0.00 | 0.3 | 43  | 2.412  |
| Ce <sub>3</sub> ICl <sub>7</sub>  | 0.044 | -2.39 | 0.00 | 1.3 | 4   | 1.237  | Tm <sub>3</sub> IBr <sub>7</sub>  | 0.075 | -1.69 | 0.00 | 0.2 | 60  | 1.717  |
| Rb <sub>8</sub> O <sub>3</sub>    | 0.045 | -0.93 | 0.03 | 0.0 | 42  | -1.449 | Pm <sub>3</sub> ICl <sub>7</sub>  | 0.075 | -2.41 | 0.00 | 0.3 | 52  | 2.362  |
| Np <sub>3</sub> TeCl <sub>7</sub> | 0.045 | -1.89 | 0.00 | 4.0 | 6   | -1.884 | Er <sub>3</sub> Br <sub>8</sub>   | 0.076 | -1.75 | 0.00 | 0.3 | 45  | 1.703  |
| Mo <sub>3</sub> TeCl <sub>7</sub> | 0.046 | -1.17 | 0.00 | 0.3 | 69  | -1.508 | Co <sub>3</sub> Cl <sub>8</sub>   | 0.076 | -0.94 | 0.00 | 0.3 | 70  | -0.394 |
| Ce <sub>3</sub> Cl <sub>8</sub>   | 0.046 | -2.54 | 0.00 | 1.3 | 8   | -0.071 | Sm <sub>3</sub> Cl <sub>8</sub>   | 0.076 | -2.56 | 0.00 | 0.3 | 161 | 2.192  |
| Ce <sub>3</sub> BrCl <sub>7</sub> | 0.047 | -2.44 | 0.00 | 1.3 | 3   | 1.246  | Pr <sub>3</sub> Br <sub>8</sub>   | 0.076 | -1.77 | 0.00 | 0.3 | 121 | 2.065  |
| Tc <sub>3</sub> I <sub>8</sub>    | 0.047 | 0.05  | 0.03 | 1.7 | 80  | 0.048  | Ru <sub>3</sub> Cl <sub>8</sub>   | 0.077 | -0.88 | 0.00 | 0.7 | 80  | -0.635 |
| Ni <sub>3</sub> I <sub>8</sub>    | 0.047 | -0.02 | 0.00 | 1.3 | 49  | -1.456 | Tb <sub>3</sub> BrCl <sub>7</sub> | 0.077 | -2.47 | 0.00 | 0.3 | 118 | 2.065  |
| Ho <sub>3</sub> I <sub>8</sub>    | 0.048 | -1.31 | 0.00 | 0.0 | 80  | 2.015  | Pm <sub>3</sub> BrCl <sub>7</sub> | 0.079 | -2.47 | 0.00 | 0.3 | 119 | 2.122  |
| Pd <sub>3</sub> Br <sub>8</sub>   | 0.049 | -0.21 | 0.00 | 0.7 | 81  | -2.353 | Ho <sub>3</sub> ICl <sub>7</sub>  | 0.079 | -2.41 | 0.00 | 0.3 | 47  | 2.405  |
| Pr <sub>3</sub> I <sub>8</sub>    | 0.049 | -1.36 | 0.00 | 0.3 | 71  | -2.452 | Dy <sub>3</sub> BrCl <sub>7</sub> | 0.080 | -2.47 | 0.00 | 0.3 | 149 | 2.592  |
| Hf <sub>3</sub> TeCl <sub>7</sub> | 0.049 | -1.92 | 0.00 | 0.3 | 19  | -2.917 | Tb <sub>3</sub> Cl <sub>8</sub>   | 0.080 | -2.57 | 0.00 | 0.3 | 173 | 2.103  |
| Hf <sub>3</sub> Br <sub>8</sub>   | 0.050 | -1.24 | 0.56 | 0.6 | 51  | -0.250 | Co <sub>3</sub> F <sub>8</sub>    | 0.081 | -2.16 | 0.00 | 3.7 | 25  | 2.225  |
| Cr <sub>3</sub> Cl <sub>8</sub>   | 0.050 | -1.47 | 0.00 | 3.3 | 55  | 1.617  | Tm <sub>3</sub> Br <sub>8</sub>   | 0.081 | -1.74 | 0.00 | 0.2 | 35  | 1.718  |
| Hf <sub>3</sub> I <sub>8</sub>    | 0.050 | -0.79 | 0.59 | 0.6 | 34  | 2.610  | La <sub>3</sub> Br <sub>8</sub>   | 0.083 | -1.87 | 0.35 | 0.4 | 1   | 0.547  |
| Pr <sub>3</sub> TeBr <sub>7</sub> | 0.050 | -1.78 | 2.69 | 0.1 | 6   | -2.151 | Pr <sub>3</sub> TeCl <sub>7</sub> | 0.083 | -2.47 | 2.86 | 0.1 | 6   | -0.275 |
| Hf <sub>3</sub> TeBr <sub>7</sub> | 0.050 | -1.19 | 0.00 | 0.4 | 72  | -0.156 | Dy <sub>3</sub> Cl <sub>8</sub>   | 0.083 | -2.57 | 0.00 | 0.3 | 146 | 2.128  |
| Pm <sub>3</sub> SeCl <sub>7</sub> | 0.051 | -2.55 | 3.33 | 0.0 | 21  | -0.124 | Er <sub>3</sub> ICl <sub>7</sub>  | 0.084 | -2.41 | 0.00 | 0.3 | 52  | 2.405  |
| Cr <sub>3</sub> Br <sub>8</sub>   | 0.051 | -0.70 | 0.00 | 3.3 | 14  | 1.869  | Pm <sub>3</sub> Cl <sub>8</sub>   | 0.084 | -2.56 | 0.00 | 0.3 | 171 | 2.170  |
| Pm <sub>3</sub> Br <sub>8</sub>   | 0.051 | -1.77 | 0.00 | 0.3 | 76  | 2.142  | Ho <sub>3</sub> BrCl <sub>7</sub> | 0.084 | -2.47 | 0.00 | 0.3 | 136 | 2.600  |
| Pm <sub>3</sub> IBr <sub>7</sub>  | 0.052 | -1.72 | 0.00 | 0.3 | 50  | 2.301  | Ni <sub>3</sub> F <sub>8</sub>    | 0.084 | -1.74 | 0.00 | 2.7 | 66  | -1.492 |
| Y <sub>3</sub> IBr <sub>7</sub>   | 0.052 | -1.72 | 0.00 | 0.3 | 61  | 2.195  | As <sub>3</sub> Br <sub>8</sub>   | 0.084 | -0.35 | 0.78 | 0.3 | 31  | 2.373  |
| Er <sub>3</sub> I <sub>8</sub>    | 0.052 | -1.30 | 0.00 | 0.0 | 81  | 2.299  | Sn <sub>3</sub> I <sub>8</sub>    | 0.086 | -0.35 | 0.00 | 0.0 | 76  | 2.884  |
| Pm <sub>3</sub> TeCl <sub>7</sub> | 0.054 | -2.48 | 2.91 | 0.1 | 14  | -0.262 | Ta <sub>3</sub> Br <sub>8</sub>   | 0.087 | -0.80 | 0.28 | 0.3 | 75  | -0.925 |
| Sm <sub>3</sub> IBr <sub>7</sub>  | 0.055 | -1.72 | 0.00 | 0.3 | 29  | 1.949  | Ho <sub>3</sub> Cl <sub>8</sub>   | 0.087 | -2.56 | 0.00 | 0.3 | 174 | 1.792  |
| Hf <sub>3</sub> BrCl <sub>7</sub> | 0.056 | -1.97 | 0.47 | 0.7 | 41  | -0.335 | Pt <sub>3</sub> Br <sub>8</sub>   | 0.088 | -0.13 | 0.00 | 0.7 | 56  | -1.165 |
| Y <sub>3</sub> Br <sub>8</sub>    | 0.057 | -1.78 | 0.00 | 0.3 | 47  | 2.105  | Tl <sub>3</sub> Br <sub>8</sub>   | 0.088 | -0.43 | 0.00 | 0.0 | 62  | -1.424 |
| Sm <sub>3</sub> Br <sub>8</sub>   | 0.057 | -1.77 | 0.00 | 0.3 | 74  | 2.162  | Er <sub>3</sub> BrCl <sub>7</sub> | 0.088 | -2.46 | 0.00 | 0.3 | 177 | 2.195  |
| Np <sub>3</sub> IBr <sub>7</sub>  | 0.057 | -1.20 | 0.00 | 4.3 | 13  | 2.975  | Co <sub>3</sub> I <sub>8</sub>    | 0.089 | -0.00 | 0.00 | 0.3 | 86  | -0.924 |
| Cr <sub>3</sub> I <sub>8</sub>    | 0.057 | -0.34 | 0.00 | 3.3 | 22  | 1.671  | Tm <sub>3</sub> ICl <sub>7</sub>  | 0.089 | -2.40 | 0.00 | 0.3 | 58  | 2.526  |
| Tb <sub>3</sub> IBr <sub>7</sub>  | 0.058 | -1.72 | 0.00 | 0.3 | 53  | 2.408  | Tl <sub>8</sub> S <sub>3</sub>    | 0.090 | -0.37 | 0.09 | 0.0 | 127 | -1.578 |
| Tm <sub>3</sub> I <sub>8</sub>    | 0.058 | -1.29 | 0.00 | 0.0 | 76  | 2.307  | La <sub>3</sub> TeCl <sub>7</sub> | 0.091 | -2.58 | 2.76 | 0.1 | 3   | 2.682  |
| Pd <sub>3</sub> F <sub>8</sub>    | 0.058 | -1.48 | 0.06 | 0.8 | 91  | -2.755 | Er <sub>3</sub> Cl <sub>8</sub>   | 0.092 | -2.56 | 0.00 | 0.3 | 160 | 1.818  |
| Hg <sub>3</sub> F <sub>8</sub>    | 0.059 | -1.45 | 0.00 | 0.6 | 18  | -0.647 | Tl <sub>3</sub> Cl <sub>8</sub>   | 0.092 | -1.04 | 0.00 | 0.0 | 11  | -2.024 |
| Np <sub>3</sub> Br <sub>8</sub>   | 0.060 | -1.25 | 0.00 | 4.3 | 13  | 2.232  | Nd <sub>3</sub> ICl <sub>7</sub>  | 0.093 | -2.41 | 0.00 | 0.3 | 50  | 2.330  |
| Nd <sub>3</sub> IBr <sub>7</sub>  | 0.060 | -1.72 | 0.00 | 0.3 | 55  | 2.281  | Bi <sub>3</sub> Br <sub>8</sub>   | 0.093 | -0.63 | 0.00 | 0.0 | 39  | 1.375  |
| Np <sub>3</sub> ICl <sub>7</sub>  | 0.060 | -1.90 | 0.00 | 4.3 | 10  | 2.230  | Nd <sub>3</sub> BrCl <sub>7</sub> | 0.094 | -2.46 | 0.00 | 0.3 | 131 | 2.078  |
| Nd <sub>3</sub> Br <sub>8</sub>   | 0.061 | -1.77 | 0.00 | 0.3 | 109 | 2.100  | Tm <sub>3</sub> BrCl <sub>7</sub> | 0.094 | -2.46 | 0.00 | 0.3 | 127 | 2.622  |
| Dy <sub>3</sub> IBr <sub>7</sub>  | 0.061 | -1.71 | 0.00 | 0.2 | 87  | 2.342  | Pd <sub>3</sub> I <sub>8</sub>    | 0.094 | -0.09 | 0.00 | 0.5 | 46  | -1.504 |
| La <sub>3</sub> I <sub>8</sub>    | 0.063 | -1.44 | 0.00 | 0.4 | 2   | 0.530  | Bi <sub>3</sub> IBr <sub>7</sub>  | 0.095 | -0.59 | 0.00 | 0.0 | 66  | 1.277  |
| Tb <sub>3</sub> Br <sub>8</sub>   | 0.063 | -1.77 | 0.00 | 0.3 | 84  | 2.058  | Pb <sub>3</sub> Cl <sub>8</sub>   | 0.096 | -1.25 | 0.00 | 0.4 | 35  | -0.787 |
| Np <sub>3</sub> BrCl <sub>7</sub> | 0.064 | -1.95 | 0.00 | 4.3 | 12  | 1.928  | Zn <sub>3</sub> F <sub>8</sub>    | 0.096 | -2.10 | 0.00 | 0.7 | 22  | -0.605 |
| In <sub>3</sub> I <sub>8</sub>    | 0.064 | -0.42 | 0.00 | 0.0 | 112 | -1.411 | Nd <sub>3</sub> Cl <sub>8</sub>   | 0.097 | -2.56 | 0.00 | 0.3 | 181 | 2.595  |
| Np <sub>3</sub> Cl <sub>8</sub>   | 0.065 | -2.05 | 0.00 | 4.3 | 14  | -0.308 | In <sub>3</sub> Br <sub>8</sub>   | 0.097 | -0.71 | 0.00 | 0.0 | 65  | -2.377 |
| Ho <sub>3</sub> IBr <sub>7</sub>  | 0.066 | -1.70 | 0.00 | 0.2 | 73  | 2.392  | Tm <sub>3</sub> Cl <sub>8</sub>   | 0.097 | -2.56 | 0.00 | 0.3 | 143 | 1.853  |
| Zr <sub>3</sub> ScI <sub>7</sub>  | 0.067 | -2.11 | 0.00 | 0.0 | 159 | 1.122  | La <sub>3</sub> ICl <sub>7</sub>  | 0.097 | -2.52 | 0.39 | 0.4 | 10  | 0.453  |
| Y <sub>3</sub> ICl <sub>7</sub>   | 0.067 | -2.42 | 0.00 | 0.3 | 47  | 2.397  | Bi <sub>3</sub> BrCl <sub>7</sub> | 0.099 | -1.21 | 0.00 | 0.0 | 78  | 1.538  |
| Hf <sub>3</sub> Cl <sub>8</sub>   | 0.067 | -2.06 | 0.45 | 0.6 | 20  | -0.290 | Hf <sub>3</sub> BiCl <sub>7</sub> | 0.100 | -1.78 | 0.18 | 0.0 | 47  | -1.978 |
| Dy <sub>3</sub> Br <sub>8</sub>   | 0.067 | -1.76 | 0.00 | 0.3 | 73  | 2.084  | Zr <sub>3</sub> SbCl <sub>7</sub> | 0.100 | -1.85 | 0.00 | 0.7 | 56  | 1.002  |
| Nd <sub>3</sub> TeCl <sub>7</sub> | 0.069 | -2.47 | 2.88 | 0.1 | 10  | -0.269 | Bi <sub>3</sub> Cl <sub>8</sub>   | 0.100 | -1.29 | 0.00 | 0.0 | 31  | -2.988 |
| Er <sub>3</sub> IBr <sub>7</sub>  | 0.070 | -1.70 | 0.00 | 0.2 | 68  | 2.399  | Rb <sub>8</sub> Cd <sub>3</sub>   | 0.101 | 0.07  | 0.00 | 0.0 | 57  | 1.564  |

|                                   |       |       |      |     |     |        |                                   |       |       |      |     |      |        |
|-----------------------------------|-------|-------|------|-----|-----|--------|-----------------------------------|-------|-------|------|-----|------|--------|
| Pt <sub>3</sub> Cl <sub>8</sub>   | 0.101 | -0.72 | 0.00 | 0.7 | 83  | -1.309 | K <sub>8</sub> Li <sub>3</sub>    | 0.173 | 0.17  | 0.00 | 0.0 | 82   | 0.526  |
| Bi <sub>3</sub> ICl <sub>7</sub>  | 0.102 | -1.17 | 0.00 | 0.0 | 54  | 1.423  | Ca <sub>3</sub> I <sub>8</sub>    | 0.173 | -1.16 | 0.00 | 0.7 | 45   | -0.656 |
| Tl <sub>8</sub> Se <sub>3</sub>   | 0.103 | -0.20 | 0.21 | 0.0 | 125 | -1.346 | Ga <sub>3</sub> Br <sub>8</sub>   | 0.176 | -0.62 | 0.00 | 0.0 | 115  | -2.012 |
| Rb <sub>8</sub> Hg <sub>3</sub>   | 0.103 | -0.04 | 0.00 | 0.0 | 63  | 1.582  | Os <sub>3</sub> Cl <sub>8</sub>   | 0.177 | -0.61 | 0.00 | 0.0 | 149  | -0.364 |
| La <sub>3</sub> BrCl <sub>7</sub> | 0.103 | -2.56 | 0.34 | 0.4 | 5   | 0.650  | Zn <sub>3</sub> Cl <sub>8</sub>   | 0.179 | -1.12 | 0.00 | 0.7 | 66   | -1.329 |
| Pt <sub>3</sub> I <sub>8</sub>    | 0.104 | -0.04 | 0.00 | 0.7 | 56  | -1.053 | Si <sub>3</sub> Te <sub>8</sub>   | 0.181 | 0.15  | 0.00 | 0.0 | 212  | -1.513 |
| Cu <sub>3</sub> Cl <sub>8</sub>   | 0.106 | -0.72 | 0.00 | 1.2 | 21  | -1.263 | Al <sub>3</sub> H <sub>8</sub>    | 0.182 | 0.06  | 0.00 | 0.0 | 1119 | 1.019  |
| Pr <sub>3</sub> ICl <sub>7</sub>  | 0.106 | -2.40 | 0.00 | 0.3 | 40  | 2.936  | Rb <sub>8</sub> H <sub>3</sub>    | 0.183 | 0.06  | 0.00 | 0.1 | 14   | -2.885 |
| Pr <sub>3</sub> BrCl <sub>7</sub> | 0.106 | -2.45 | 0.00 | 0.3 | 123 | 2.871  | Cd <sub>3</sub> Br <sub>8</sub>   | 0.184 | -0.52 | 0.00 | 0.7 | 83   | -1.834 |
| Tl <sub>3</sub> F <sub>8</sub>    | 0.109 | -2.04 | 0.00 | 0.0 | 125 | 1.449  | Ti <sub>3</sub> F <sub>8</sub>    | 0.184 | -3.40 | 0.00 | 1.3 | 56   | 0.259  |
| Ta <sub>3</sub> Cl <sub>8</sub>   | 0.109 | -1.62 | 0.16 | 0.3 | 35  | -1.165 | Al <sub>3</sub> Br <sub>8</sub>   | 0.185 | -0.87 | 0.00 | 0.0 | 232  | 2.619  |
| Pr <sub>3</sub> Cl <sub>8</sub>   | 0.109 | -2.55 | 0.00 | 0.3 | 134 | 2.849  | Hf <sub>3</sub> HgCl <sub>7</sub> | 0.186 | -1.68 | 0.00 | 0.0 | 29   | -1.055 |
| K <sub>8</sub> Ag <sub>3</sub>    | 0.110 | 0.11  | 0.00 | 0.0 | 117 | 0.923  | Tc <sub>3</sub> Cl <sub>8</sub>   | 0.187 | -0.94 | 0.00 | 1.7 | 35   | 0.310  |
| V <sub>3</sub> F <sub>8</sub>     | 0.111 | -3.04 | 0.00 | 2.3 | 38  | -0.076 | Hg <sub>3</sub> Br <sub>8</sub>   | 0.189 | -0.18 | 0.00 | 0.6 | 47   | -1.281 |
| Tl <sub>3</sub> ClF <sub>7</sub>  | 0.112 | -1.91 | 0.00 | 0.0 | 30  | -2.863 | Nb <sub>3</sub> HgCl <sub>7</sub> | 0.190 | -1.32 | 0.41 | 0.0 | 30   | -0.935 |
| Sb <sub>3</sub> Br <sub>8</sub>   | 0.113 | -0.48 | 0.00 | 0.0 | 60  | 1.366  | Te <sub>8</sub> As <sub>3</sub>   | 0.190 | 0.18  | 0.00 | 0.0 | 99   | -1.652 |
| In <sub>3</sub> Cl <sub>8</sub>   | 0.115 | -1.40 | 0.00 | 0.0 | 136 | 0.269  | Ga <sub>3</sub> Cl <sub>8</sub>   | 0.195 | -1.32 | 0.00 | 0.0 | 626  | 0.181  |
| Sn <sub>3</sub> Br <sub>8</sub>   | 0.115 | -0.60 | 0.00 | 0.0 | 53  | -1.084 | K <sub>8</sub> Cl <sub>3</sub>    | 0.196 | -1.03 | 0.00 | 0.0 | 283  | 1.628  |
| In <sub>3</sub> BrCl <sub>7</sub> | 0.116 | -1.31 | 0.00 | 0.0 | 161 | 0.253  | Ag <sub>3</sub> I <sub>8</sub>    | 0.198 | 0.06  | 0.00 | 0.0 | 66   | -1.876 |
| K <sub>8</sub> Hg <sub>3</sub>    | 0.116 | -0.03 | 0.00 | 0.0 | 113 | 1.670  | As <sub>3</sub> Se <sub>8</sub>   | 0.198 | 0.11  | 0.00 | 0.0 | 69   | -0.500 |
| Rb <sub>8</sub> Na <sub>3</sub>   | 0.117 | 0.12  | 0.00 | 0.0 | 102 | 0.468  | Ca <sub>3</sub> Br <sub>8</sub>   | 0.199 | -1.47 | 0.06 | 0.7 | 25   | -0.579 |
| Ag <sub>3</sub> Cl <sub>8</sub>   | 0.117 | -0.57 | 0.00 | 0.9 | 23  | -1.031 | Rb <sub>3</sub> F <sub>3</sub>    | 0.199 | -1.38 | 0.00 | 0.0 | 84   | 2.919  |
| Ge <sub>3</sub> I <sub>8</sub>    | 0.119 | -0.17 | 0.00 | 0.0 | 47  | -2.369 | K <sub>8</sub> H <sub>3</sub>     | 0.201 | 0.05  | 0.00 | 0.1 | 154  | 2.744  |
| Mo <sub>3</sub> Cl <sub>8</sub>   | 0.120 | -1.21 | 0.20 | 0.7 | 77  | -2.043 | Hg <sub>3</sub> I <sub>8</sub>    | 0.202 | -0.04 | 0.00 | 0.0 | 76   | -1.901 |
| In <sub>3</sub> ICl <sub>7</sub>  | 0.121 | -1.27 | 0.00 | 0.0 | 201 | 0.203  | W <sub>3</sub> Cl <sub>8</sub>    | 0.202 | -1.00 | 0.24 | 0.7 | 55   | -2.530 |
| K <sub>8</sub> Cd <sub>3</sub>    | 0.121 | 0.08  | 0.00 | 0.0 | 97  | 2.428  | Ga <sub>3</sub> F <sub>8</sub>    | 0.203 | -2.66 | 0.00 | 0.0 | 158  | 2.027  |
| As <sub>3</sub> I <sub>8</sub>    | 0.122 | -0.05 | 0.00 | 0.0 | 84  | 1.005  | Ru <sub>3</sub> F <sub>8</sub>    | 0.205 | -1.64 | 0.00 | 0.7 | 22   | -0.340 |
| Cr <sub>3</sub> F <sub>8</sub>    | 0.123 | -2.86 | 0.00 | 3.3 | 24  | 0.425  | Ge <sub>3</sub> Cl <sub>8</sub>   | 0.208 | -1.08 | 0.00 | 0.4 | 57   | -1.904 |
| Tl <sub>8</sub> Au <sub>3</sub>   | 0.124 | 0.09  | 0.00 | 0.0 | 145 | -2.897 | Pb <sub>3</sub> F <sub>8</sub>    | 0.214 | -2.33 | 0.00 | 0.0 | 14   | -2.552 |
| Cu <sub>3</sub> Br <sub>8</sub>   | 0.125 | -0.11 | 0.00 | 0.0 | 124 | -1.979 | Se <sub>3</sub> I <sub>8</sub>    | 0.215 | 0.20  | 0.00 | 0.7 | 50   | 1.307  |
| Au <sub>3</sub> I <sub>8</sub>    | 0.129 | 0.09  | 0.00 | 0.0 | 51  | -1.257 | Ga <sub>3</sub> Bi <sub>8</sub>   | 0.217 | 0.22  | 0.00 | 0.0 | 675  | -1.404 |
| Cu <sub>3</sub> I <sub>8</sub>    | 0.131 | 0.06  | 0.00 | 0.0 | 37  | -1.905 | Ca <sub>3</sub> Cl <sub>8</sub>   | 0.217 | -2.15 | 0.05 | 0.7 | 19   | -0.838 |
| Tc <sub>3</sub> Br <sub>8</sub>   | 0.133 | -0.21 | 0.00 | 1.7 | 21  | 0.335  | Sb <sub>3</sub> Te <sub>8</sub>   | 0.219 | 0.13  | 0.00 | 0.0 | 123  | -0.448 |
| Hf <sub>3</sub> SbCl <sub>7</sub> | 0.134 | -1.81 | 0.00 | 0.7 | 71  | 1.283  | Ce <sub>3</sub> F <sub>8</sub>    | 0.219 | -3.97 | 0.01 | 1.3 | 8    | 0.851  |
| Pb <sub>3</sub> Br <sub>8</sub>   | 0.134 | -0.61 | 0.00 | 0.0 | 48  | -0.444 | Mo <sub>3</sub> I <sub>8</sub>    | 0.219 | -0.09 | 0.03 | 0.7 | 25   | -2.195 |
| Tl <sub>8</sub> Te <sub>3</sub>   | 0.136 | -0.11 | 0.48 | 0.0 | 200 | -1.028 | K <sub>8</sub> F <sub>3</sub>     | 0.219 | -1.39 | 0.00 | 0.0 | 267  | 1.436  |
| Tl <sub>8</sub> Sb <sub>3</sub>   | 0.137 | 0.12  | 0.00 | 0.0 | 320 | 2.806  | Na <sub>8</sub> H <sub>3</sub>    | 0.224 | 0.08  | 0.00 | 0.0 | 443  | 0.756  |
| Mg <sub>3</sub> I <sub>8</sub>    | 0.138 | -0.72 | 0.00 | 0.3 | 74  | -0.758 | Zn <sub>3</sub> Br <sub>8</sub>   | 0.225 | -0.50 | 0.00 | 0.5 | 113  | -2.127 |
| Au <sub>3</sub> Br <sub>8</sub>   | 0.138 | 0.02  | 0.00 | 0.0 | 75  | -1.610 | Cu <sub>3</sub> Te <sub>8</sub>   | 0.226 | 0.19  | 0.00 | 0.0 | 87   | -2.654 |
| Sn <sub>3</sub> Cl <sub>8</sub>   | 0.149 | -1.25 | 0.00 | 0.0 | 33  | -2.257 | Al <sub>3</sub> Cl <sub>8</sub>   | 0.227 | -1.67 | 0.00 | 0.0 | 198  | 2.509  |
| Al <sub>3</sub> I <sub>8</sub>    | 0.149 | -0.48 | 0.00 | 0.0 | 104 | -2.687 | Zr <sub>3</sub> F <sub>8</sub>    | 0.229 | -3.43 | 0.80 | 0.6 | 71   | -0.229 |
| Sb <sub>3</sub> ICl <sub>7</sub>  | 0.149 | -1.02 | 0.00 | 0.0 | 74  | 1.436  | Zn <sub>3</sub> I <sub>8</sub>    | 0.231 | -0.26 | 0.00 | 0.0 | 139  | -1.844 |
| Cd <sub>3</sub> Cl <sub>8</sub>   | 0.151 | -1.11 | 0.00 | 0.7 | 39  | -0.977 | As <sub>3</sub> Cl <sub>8</sub>   | 0.231 | -0.90 | 0.00 | 0.0 | 85   | 1.562  |
| Pb <sub>3</sub> I <sub>8</sub>    | 0.152 | -0.38 | 0.00 | 0.0 | 57  | -0.224 | Al <sub>3</sub> Te <sub>8</sub>   | 0.233 | -0.08 | 0.00 | 0.0 | 290  | -2.748 |
| Hg <sub>3</sub> Cl <sub>8</sub>   | 0.152 | -0.73 | 0.00 | 0.7 | 21  | -1.218 | Tl <sub>8</sub> F <sub>3</sub>    | 0.233 | -0.85 | 0.00 | 0.0 | 911  | 1.542  |
| Tl <sub>3</sub> I <sub>8</sub>    | 0.154 | -0.21 | 0.00 | 0.0 | 68  | -2.135 | In <sub>8</sub> Ge <sub>3</sub>   | 0.237 | 0.24  | 0.00 | 0.0 | 570  | 1.038  |
| Ag <sub>3</sub> Br <sub>8</sub>   | 0.154 | -0.03 | 0.00 | 0.0 | 47  | -2.072 | W <sub>3</sub> Br <sub>8</sub>    | 0.238 | -0.22 | 0.06 | 0.7 | 57   | 0.322  |
| Mo <sub>3</sub> Br <sub>8</sub>   | 0.154 | -0.44 | 0.03 | 0.7 | 48  | 0.735  | Li <sub>3</sub> I <sub>8</sub>    | 0.240 | -0.42 | 0.00 | 0.0 | 274  | -2.067 |
| Os <sub>3</sub> Br <sub>8</sub>   | 0.154 | 0.08  | 0.23 | 0.0 | 58  | 0.182  | Bi <sub>3</sub> F <sub>8</sub>    | 0.242 | -2.47 | 0.00 | 0.0 | 254  | 0.831  |
| Hg <sub>8</sub> F <sub>3</sub>    | 0.156 | -0.63 | 0.00 | 0.0 | 217 | -2.867 | P <sub>3</sub> Se <sub>8</sub>    | 0.248 | 0.20  | 0.00 | 0.0 | 357  | -0.722 |
| Sb <sub>3</sub> Cl <sub>8</sub>   | 0.157 | -1.13 | 0.00 | 0.0 | 66  | -2.446 | Tc <sub>3</sub> F <sub>8</sub>    | 0.250 | -1.88 | 0.47 | 1.7 | 14   | -0.267 |
| Zr <sub>3</sub> HgCl <sub>7</sub> | 0.160 | -1.75 | 0.12 | 1.0 | 25  | -0.936 | Sn <sub>3</sub> Bi <sub>8</sub>   | 0.250 | 0.25  | 0.00 | 0.0 | 563  | -1.170 |
| In <sub>3</sub> F <sub>8</sub>    | 0.160 | -2.62 | 0.00 | 0.0 | 289 | 1.987  | Sn <sub>3</sub> Te <sub>8</sub>   | 0.252 | 0.09  | 0.00 | 0.0 | 155  | -1.182 |
| Tl <sub>8</sub> As <sub>3</sub>   | 0.161 | 0.16  | 0.00 | 0.0 | 141 | -1.516 | Ga <sub>3</sub> Au <sub>8</sub>   | 0.253 | 0.12  | 0.00 | 0.0 | 556  | -1.720 |
| Ga <sub>3</sub> I <sub>8</sub>    | 0.161 | -0.31 | 0.00 | 0.0 | 14  | -2.924 | Te <sub>8</sub> Au <sub>3</sub>   | 0.253 | 0.18  | 0.00 | 0.0 | 221  | -1.871 |
| Ga <sub>3</sub> Hg <sub>8</sub>   | 0.162 | 0.16  | 0.00 | 0.0 | 690 | -2.059 | Se <sub>3</sub> Cl <sub>8</sub>   | 0.264 | -0.48 | 0.00 | 0.7 | 16   | -1.884 |
| Au <sub>3</sub> Cl <sub>8</sub>   | 0.165 | -0.52 | 0.00 | 0.5 | 22  | -1.324 | Na <sub>8</sub> Br <sub>3</sub>   | 0.267 | -0.59 | 0.00 | 0.0 | 127  | -0.298 |
| Hg <sub>8</sub> Au <sub>3</sub>   | 0.165 | 0.16  | 0.00 | 0.0 | 350 | -1.442 | Li <sub>8</sub> H <sub>3</sub>    | 0.270 | 0.01  | 0.00 | 0.0 | 326  | -1.309 |
| Fe <sub>3</sub> F <sub>8</sub>    | 0.166 | -2.60 | 0.00 | 4.7 | 19  | 1.770  | Na <sub>8</sub> Cl <sub>3</sub>   | 0.271 | -0.88 | 0.00 | 0.0 | 324  | -0.331 |
| Mg <sub>3</sub> Br <sub>8</sub>   | 0.167 | -1.05 | 0.00 | 0.7 | 53  | -0.705 | Te <sub>3</sub> O <sub>8</sub>    | 0.273 | -1.12 | 0.00 | 0.0 | 114  | -2.933 |
| Zn <sub>3</sub> Hg <sub>8</sub>   | 0.168 | 0.17  | 0.00 | 0.0 | 656 | -0.694 | Cd <sub>3</sub> Au <sub>8</sub>   | 0.277 | 0.13  | 0.00 | 0.0 | 622  | -0.258 |
| Cd <sub>3</sub> I <sub>8</sub>    | 0.169 | -0.32 | 0.00 | 0.0 | 59  | -1.520 | Tl <sub>8</sub> Cl <sub>3</sub>   | 0.278 | -0.44 | 0.00 | 0.0 | 467  | 2.560  |
| Rb <sub>8</sub> Li <sub>3</sub>   | 0.169 | 0.17  | 0.00 | 0.0 | 49  | 0.916  | Sn <sub>3</sub> Se <sub>8</sub>   | 0.278 | -0.01 | 0.14 | 0.0 | 83   | -1.184 |
| Ge <sub>3</sub> Br <sub>8</sub>   | 0.171 | -0.41 | 0.00 | 0.0 | 96  | -0.763 | Sb <sub>3</sub> Se <sub>8</sub>   | 0.286 | 0.11  | 0.00 | 0.0 | 167  | -0.445 |

|                                 |       |       |      |     |     |        |
|---------------------------------|-------|-------|------|-----|-----|--------|
| As <sub>3</sub> S <sub>8</sub>  | 0.296 | -0.14 | 0.00 | 0.0 | 174 | -0.535 |
| Ga <sub>3</sub> Te <sub>8</sub> | 0.297 | 0.07  | 0.00 | 0.0 | 366 | -2.578 |
| Na <sub>3</sub> I <sub>8</sub>  | 0.298 | -0.39 | 0.00 | 0.0 | 239 | -1.974 |
| In <sub>3</sub> Te <sub>8</sub> | 0.303 | 0.08  | 0.00 | 0.0 | 202 | 1.292  |
| Ge <sub>3</sub> Bi <sub>8</sub> | 0.306 | 0.31  | 0.00 | 0.0 | 532 | -2.099 |
| Si <sub>3</sub> I <sub>8</sub>  | 0.308 | -0.03 | 0.00 | 0.0 | 125 | -1.565 |
| Ba <sub>8</sub> H <sub>3</sub>  | 0.310 | 0.07  | 0.00 | 0.0 | 47  | 0.366  |
| Sb <sub>3</sub> F <sub>8</sub>  | 0.311 | -2.32 | 0.00 | 0.0 | 29  | -2.652 |
| Re <sub>3</sub> Br <sub>8</sub> | 0.317 | 0.08  | 0.22 | 1.7 | 55  | -2.904 |
| Bi <sub>8</sub> Sb <sub>3</sub> | 0.319 | 0.31  | 0.00 | 0.0 | 314 | -1.641 |
| Ni <sub>3</sub> Hg <sub>8</sub> | 0.319 | 0.32  | 0.00 | 0.0 | 53  | -0.717 |
| Be <sub>3</sub> Cl <sub>8</sub> | 0.323 | -1.21 | 0.00 | 0.6 | 340 | -1.431 |
| Be <sub>3</sub> I <sub>8</sub>  | 0.323 | -0.14 | 0.00 | 0.0 | 288 | -0.560 |
| Hg <sub>3</sub> Te <sub>8</sub> | 0.334 | 0.24  | 0.00 | 0.0 | 271 | -0.960 |
| P <sub>3</sub> S <sub>8</sub>   | 0.344 | -0.30 | 0.00 | 0.0 | 190 | -0.663 |
| Zn <sub>3</sub> Te <sub>8</sub> | 0.353 | 0.10  | 0.06 | 0.0 | 238 | -0.477 |
| Be <sub>3</sub> Br <sub>8</sub> | 0.355 | -0.48 | 0.00 | 0.0 | 291 | -1.274 |
| Al <sub>3</sub> F <sub>8</sub>  | 0.392 | -3.38 | 0.00 | 0.0 | 381 | 2.308  |
| I <sub>3</sub> O <sub>8</sub>   | 0.393 | -0.32 | 0.00 | 0.0 | 84  | -2.188 |
| Hf <sub>3</sub> F <sub>8</sub>  | 0.402 | -3.37 | 0.76 | 0.7 | 33  | -0.759 |
| H <sub>3</sub> Pd <sub>8</sub>  | 0.405 | 0.31  | 0.00 | 0.0 | 217 | -2.875 |
| As <sub>3</sub> F <sub>8</sub>  | 0.419 | -2.00 | 0.00 | 0.0 | 91  | -2.853 |
| Re <sub>3</sub> Cl <sub>8</sub> | 0.440 | -0.64 | 0.34 | 1.7 | 28  | -0.222 |
| Si <sub>3</sub> Br <sub>8</sub> | 0.444 | -0.29 | 0.00 | 0.0 | 103 | -2.833 |
| P <sub>3</sub> Cl <sub>8</sub>  | 0.445 | -0.66 | 0.00 | 0.0 | 86  | -2.863 |
| Ag <sub>8</sub> Te <sub>3</sub> | 0.480 | 0.44  | 0.00 | 0.0 | 86  | -1.391 |
| Te <sub>3</sub> Au <sub>8</sub> | 0.526 | 0.47  | 0.00 | 0.0 | 49  | -2.420 |
| B <sub>3</sub> I <sub>8</sub>   | 0.740 | 0.69  | 0.00 | 0.0 | 311 | 2.261  |

TABLE S2. Calculated elastic constants in N/m.

| Formula                           | $C_{11}$ | $C_{12}$ | $C_{22}$ | $C_{66}$ |
|-----------------------------------|----------|----------|----------|----------|
| Nb <sub>3</sub> SeCl <sub>7</sub> | 62.9     | 17.2     | 59.6     | 19.1     |
| Nb <sub>3</sub> TeCl <sub>7</sub> | 53.1     | 16.1     | 53.3     | 18.5     |
| Nb <sub>3</sub> TeBr <sub>7</sub> | 52.8     | 16.0     | 53.5     | 18.8     |
| Y <sub>3</sub> TeCl <sub>7</sub>  | 18.8     | 5.6      | 18.8     | 6.7      |
| Zr <sub>3</sub> TeCl <sub>7</sub> | 19.3     | 15.5     | 19.3     | 1.9      |
| Mo <sub>3</sub> TeCl <sub>7</sub> | 27.9     | 52.7     | 27.8     | -12.5    |
| In <sub>3</sub> TeCl <sub>7</sub> | 24.3     | 10.7     | 24.1     | 6.9      |
| Sb <sub>3</sub> ICl <sub>7</sub>  | 6.4      | 14.9     | 6.4      | -4.2     |
| Nd <sub>3</sub> TeBr <sub>7</sub> | 16.8     | 4.0      | 16.8     | 6.2      |

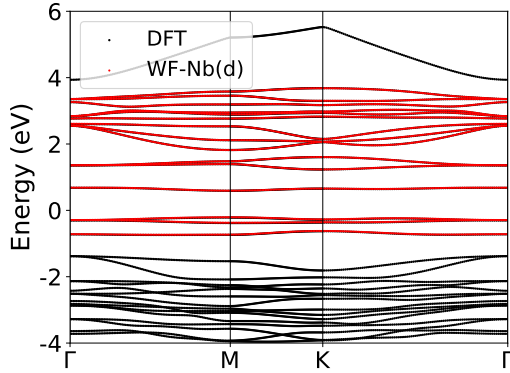FIG. S1. Electronic band structure of Nb<sub>3</sub>SBr<sub>7</sub> from DFT (black) and interpolated by the tight-binding model (red).

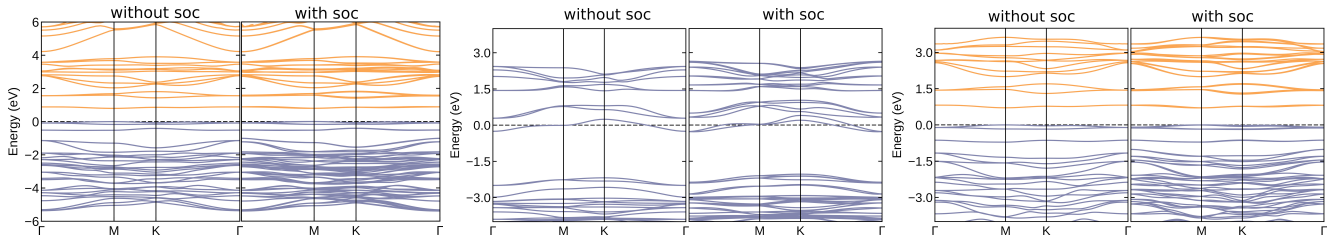

FIG. S2. The band structures of  $\text{Nb}_3\text{SBr}_7$  (left),  $\text{Sb}_3\text{ICl}_7$  (middle), and  $\text{Nb}_3\text{TeBr}_7$  (right) without and with spin-orbit coupling (SOC).

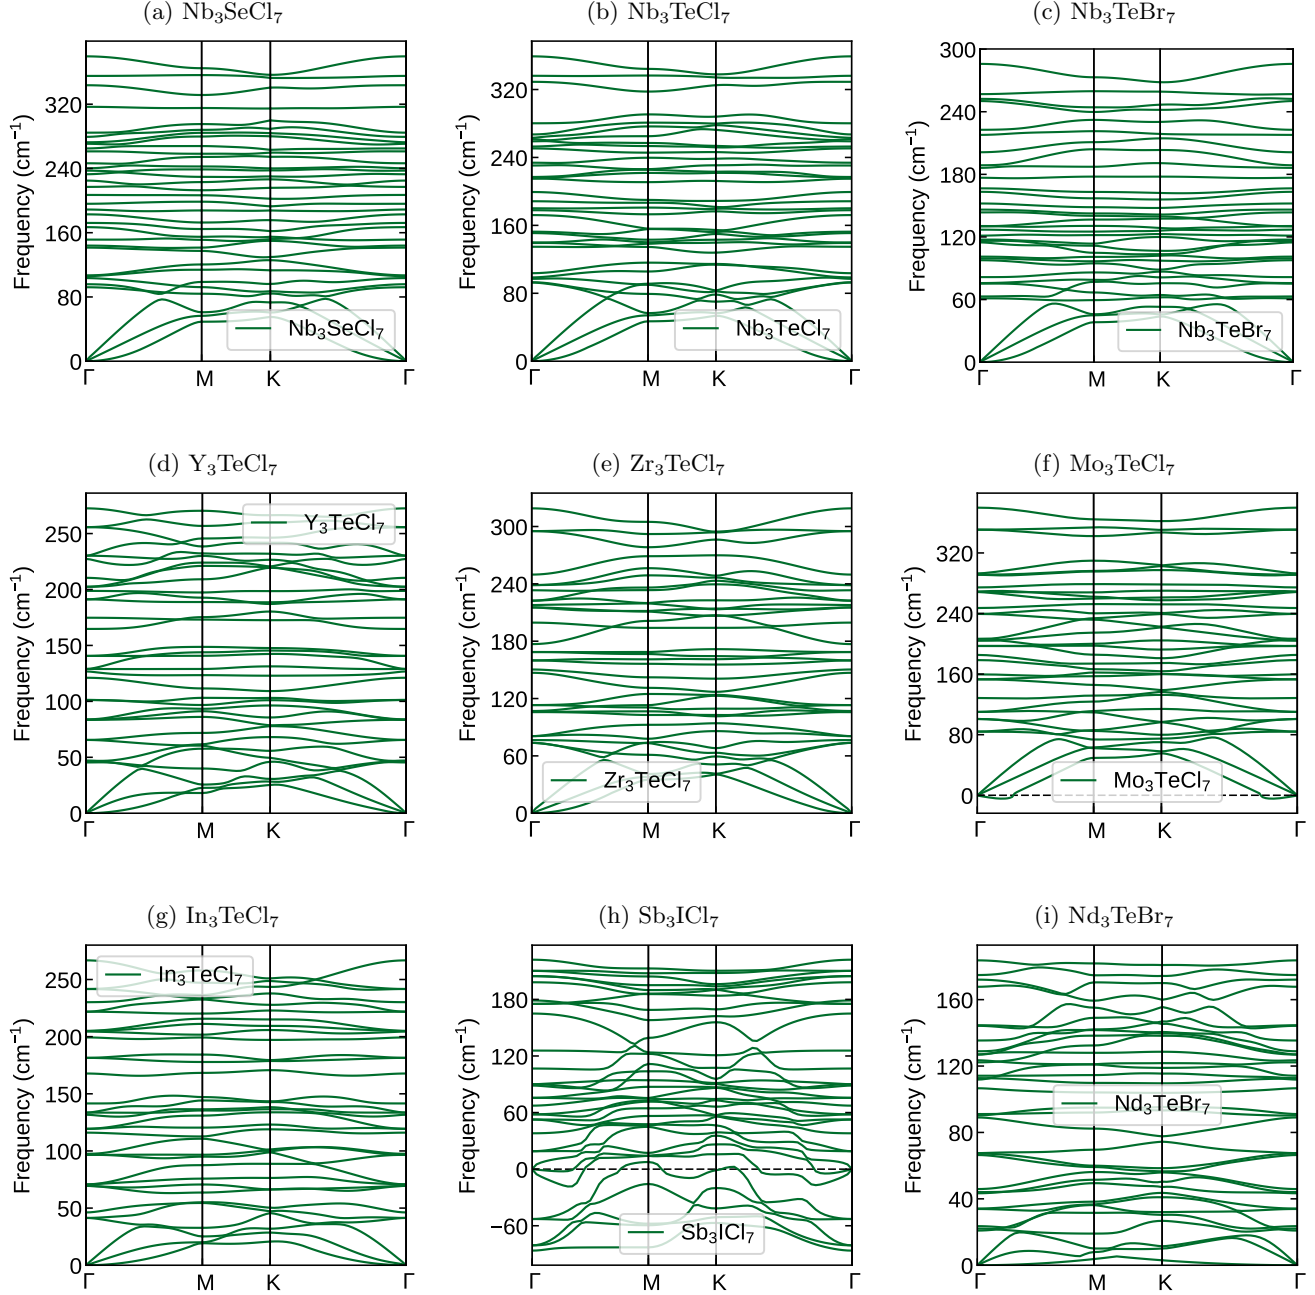

FIG. S3. Phonon band-structure of a few selected members of the  $\text{M}_3\text{QX}_7$  family.
